# Supplementary material for: Experimental renal transplantation in rats improves cardiac dysfunction caused by chronic kidney disease while LVH persists
Source: Front Cardiovasc Med. 2023 Jun 29;10:1200323. doi: 10.3389/fcvm.2023.1200323 (PMC10340545; doi:10.3389/fcvm.2023.1200323)
Supplement: Supplementary file 1 [file Table1.xlsx]

## Sheet: Pilot 8 wks
No.	Group	GSI [Score 0-4]	TSI [score 0-4]	Proteinuria [mg/24h]	Serum Creatinine [mg/dl]	wk 4 Serum FGF23 [ng/ml]	rel. Heart weight [mg/g]
1	control	0.36	0.4	10.9	0.18	0.132	2.75377
2	control	0.4	0.8	15.21	0.21	0.122	2.65177
3	control	0.28	0.4	9.25	0.24	0.486	2.36774
4	control	0.36	0.5	9.22	0.27	0.211	2.64857
5	control	0.16	0.7	11.24	0.48	0.255	2.77892
6	control	0.36	0.3	10.94	0.27	0.301	2.68961
7	SNx	2.16	2.2	111.95	0.56	1.326	4.16229
8	SNx	1.96	1.8	110.56	0.89	0.354	3.28627
9	SNx	1.95238	1.2	123.72	0.48	3.44	3.19902
10	SNx	2.08	1.5	142.9	0.49	2.13	3.08973
11	SNx	1.96	1.8	206.66	0.79	1.052	3.13713
12	SNx	1.54546	2.4	29.78	0.59	1.286	2.61421
13	SNx	2.12	2.4	310.59	0.79	3.16	4.72119
14	SNx	2.2	1.1	113.95	0.73	0.219	2.9892
15	SNx	1.8	1.7	60.5	0.64	1.564	3.58182
16	SNx	2.92	2.3	155.23	0.8		4.04923
17	SNx	1.52	1.3	41.53	0.62		3.45393

## Sheet: 8 wks echo
					PSLAX	SAX
Tier	Biopsy-No.	Group	Time point	Prot./24h	[mg]	[mg]
	PCD			[mg/24h]	LV Mass Cor	LV Mass Cor
301-939-1	3758	control	8 wks	11.2293	328.677	471.394
301-939-2	3759	control	8 wks	7.69438	469.833	622.881
301-939-3	3760	control	8 wks	6.63583	504.587	714.172
301-939-4	3761	control	8 wks	11.1377	530.796	540.267
301-943-1	3765	control	8 wks	11.5048	659.763	578.811
301-943-2	3766	control	8 wks	10.7324	324.218	754.972
301-943-3	3767	control	8 wks	14.1685	444.962	281.667
301-943-4	3768	control	8 wks	8.65445	210.74	354.965
301-941-1	3762	5/6	8 wks	64.9304	770.187	628.858
301-942-1	3763	5/6	8 wks	70.0437	730.332	631.055
301-942-3	3764	5/6	8 wks	172.225	542.012	798.79
301-944-1	3769	5/6	8 wks	52.1716	608.263	571.093
301-944-3	3770	5/6	8 wks	21.4512	618.827	647.621
301-948-1	3772	5/6	8 wks	60.93	651.348	838.146
301-948-2	3773	5/6	8 wks	193.97	906.704	1194.34
301-948-3	3774	5/6	8 wks	27.682	541.339	679.141
301-946-3	3754	Tx	8 wks	111.474	754.308	758.816
301-947-1	3755	Tx	8 wks	75.8346	703.788	642.787
301-947-2	3756	Tx	8 wks	64.366	573.695	662.17
301-947-4	3757	Tx	8 wks	85.9746	740.773	686.466
301-1123-4	4442	Tx	8 wks	145.78	896.956	899.918
301-1161-1	4472	Tx	8 wks	148.219	800.284	870.622
301-1205-2	4540	Tx	8 wks	89.7759	1034.3	752.598
301-1226-3	4563	Tx	8 wks	68.6687	678.729	607.064
301-1308-1	4622	Tx	8 wks	32.061	696.174	481.292
301-1308-2	4623	Tx	8 wks	26.7266	843.916	768.218
301-1339-1	4680	Tx	8 wks	97.0522	963.719	610.302
301-1339-5	4683	Tx	8 wks	68.7554	1012.63	1062.09
301-1349-2	4691	Tx	8 wks	63.0225	618.097	694.993
301-1059-1	4107	Tx	8 wks	90.0336	788.78	763.163
301-1123-3	4441	Tx	8 wks	49.4442	892.698	872.216
301-1339-3	4681	Tx	8 wks	94.5647	880.873	750.124

## Sheet: 16 wks Endpoint 
										PSLAX	PSLAX	SAX	left ventricular wall thickness	Linear	Linear	Linear	Myocard	PAS-Stain Kidney	Immunhisto Heart							Taqman
Tier	Biopsy-No.	Group	Time Point	Prot./24h	Creatinin (S)	Body weight	heart weight	Urea [s]	rel. Heart weight	mm	mm	[mg]	[µm]	[µl]	[%]	[%]	mm		ED-1 -Macrophages	Fibronectin score	Collagen 1 score	microscarring	FGF 23	BNP	CTGF	FGF23	FGFR4	Fibronektin	IL6
	PCD			[mg/24h]	[mg/dl]	[g]	[g]	[mg/dl]	[mg/g]	Diameter;s	Diameter;d	LV Mass corr	HE sections	Volume;d	FS	EF	a;d average LV epicardial radius in diastole	GSI	mean /field of vision	mean /field of vision	mean /field of vision	mean score	[fold change]	[fold change]	[fold change]	[fold change]	[fold change]	[fold change]	[fold change]
301-939-1	3995	Kontrolle	16 Weeks	13.9482	0.19	325.7	0.863	37.4	2.64968	3.4074	6.2834	572.102	2394.25	73.8	37.9888	66.9473	5.45969	0.2	5.4	0.6	0.764706	0.142857	1.25	0.433201	0.707954	1.25164	0.885088	0.696743	0.897898
301-939-2	3996	Kontrolle	16 Weeks	11.2135	0.21	356.2	0.876	40.7	2.45929	4.50904	6.92669	571.398	2272	100.5	30.0578	56.0773	5.67487	0.2	9.6	0.6	0.666667	0.307692	0.55	0.570187	0.822854	0.554169	0.634001	0.687516	0.516523
301-939-3	3997	Kontrolle	16 Weeks	12.9241	0.24	369.2	0.928	35.1	2.51354	4.01014	6.65387	689.695	2174	85.9	37.8588	66.5743	5.41624	0.28	6	0.4	0.866667	0.0833333	0.62	0.7245	0.908921	0.629032	0.704367	0.99874	2.48866
301-939-4	3998	Kontrolle	16 Weeks	11.6278	0.33	358.7	0.796	49	2.21912	3.76566	6.71046	608.559	2869.75	47.4	46.2785	76.6675	5.15586	0.08	10.8	0.2	0.625	0.263158	0.44	0.341932	0.464389	0.449525	0.751219	0.4861	0.570932
301-943-1	4002	Kontrolle	16 Weeks	9.44362	0.23	363.9	0.926	44	2.54466	2.65162	7.08667	697.374	2294.75	31.3	55.33	85.0761	5.57163	0.32	7	0.4	0.764706	0.181818	1.13	1.26305	1.32601	1.13733	0.794787	0.862696	0.806081
301-943-2	4003	Kontrolle	16 Weeks	10.7877	0.27	363.7	0.986	40.6	2.71103	3.64031	7.17694	653.059	2134.25	58.7	44.5652	74.6438	5.76294	0.32	14.2	0.6	0.875	0	0.88	1.26745	0.974212	0.886379	0.608689	0.624086	0.93296
301-943-3	4004	Kontrolle	16 Weeks	8.85101	0.2	343.7	0.884	38.6	2.57201	2.98677	6.94712	505	2611.25	53.2	48.0235	78.2029	5.58399	0.2	12.6	0.8	0.727273	0.142857	2.28	3.66353	1.68201	2.28419	2.28523	2.7416	1.00024
301-943-4	4005	Kontrolle	16 Weeks	10.872	0.22	356.3	0.85	37.3	2.38563	3.57309	6.90605	576.953	2371	72.8	38.8552	68.005	5.26327	0.16	9	0.4	0.642857	0.153846	2.2	2.78653	1.87169	2.21417	3.04637	2.91313	2.01738
301-941-1	3999	5/6	16 Weeks	257.001	0.85	345.1	1.059	142.7	3.06868	5.41339	8.12407	729.013	2753.5	157.5	25.2252	48.2867	6.22424	2.72	3	1.8	1.61111	0.4	12.7	4.30699	2.55224	12.7288	1.65676	5.06872	3.92048
301-942-1	4000	5/6	16 Weeks	185.594	0.99	351.8	1.212	141.2	3.44514	5.38984	7.76671	509.597	2943	145.8	30.1507	55.6948	5.45738	3	5	2.4	1.41667	0.588235	6.29	1.02075	0.466709	6.29642	0.927412	1.07156	0.731994
301-942-3	4001	5/6	16 Weeks	327.137	1.57	295.1	1.083	233.1	3.66994	5.64982	7.23784	983.637	2843	161.2	19.0217	38.1126	6.07534	3.08	1.8	2.8	2	0.230769	6.87	1.32676	1.09843	6.87419	0.462862	1.20988	0.857817
301-944-1	4006	5/6	16 Weeks	361.355	1.16	334.1	1.304	155	3.90302	4.75251	7.49445	825.367	2863.5	99.7	36.1482	64.2486	6.38834	2.88	8	0.6	2.28571	0.5	3.48	1.93315	1.32864	3.48321	0.661002	1.55237	10.7952
301-944-3	4007	5/6	16 Weeks	168.171	0.91	315.3		106.9		2.92465	6.80449	645.778		37.7	52.3427	82.4831	5.72375	2.92	9.8	1.4	1.8125	0.636364	4.23	0.621583	0.89906	4.23297	0.840034	0.879172	1.56687
301-948-1	4012	5/6	16 Weeks	234.432	1.12	334.9	1.264	164.3	3.77426	4.2907	7.81977	817.172	3193.25	95.7	40.8654	69.9535	5.92776	3.12	6	1.2	1.25	0.428571	20.91	10.3722	6.95318	20.9123	3.2434	9.17824	33.6163
301-948-2	4013	5/6	16 Weeks	413.133	3.33	278	1.769	403.1	6.36331	5.94561	8.54796	992.318	3401.75	169.1	28.8462	53.6254	6.56027	3.72	8	2.2	1.36842	0.555556	9.92	2.23589	3.69624	9.92808	1.04097	5.78852	5.6182
301-948-3	4014	5/6	16 Weeks	125.903	0.61	326.6	1.006	84.9	3.08022	4.31416	6.9283	846.148	2674.75	93.1	34.5	62.2357	5.52467	0.6	7.8	1.2	1.72222	0.631579	22.08	10.4342	3.34561	22.0815	4.90367	17.1572	6.67375
301-946-3	4008	Tx	16 Weeks	67.2307	0.27	341.2	1.355	53.2	3.97128	3.63402	6.91422	758.176	2792.5	58.6	48.3696	78.4049	5.81395	0.52	17.8	1.4	1.04348	0.421053	1.92	1.6916	0.923207	1.92128	1.05626	1.46263	0.369079
301-947-1	4009	Tx	16 Weeks	151.591	1.19	313.8	1.281	119.1	4.08222	4.0321	7.30757	847.571	2682	94.7	37.3684	65.8371	6.0146	1.92	19.2	1.8	1.29412	0.384615	1.69	2.83896	1.31622	16.9496	1.0088	1.78247	2.38833
301-947-2	4010	Tx	16 Weeks	43.8679	0.38	358.6	1.244	53.3	3.46905	4.6784	8.65656	835.647	2967.25	85.7	46.9289	76.5295	6.36555	1.5	16	2.2	1.10714	0.380952	2.44	2.02322	1.63493	2.44953	0.586072	1.22241	0.969521
301-947-4	4011	Tx	16 Weeks	389.092	1.38	324	1.466	125.3	4.52469	6.12147	8.72982	1051.88	3012.25	151.2	24.4407	46.7989	6.41625		27.8		0.913043	0.375
301-1123-4	4495	Tx	16 Weeks	16.7287	0.27	351.5	1.111	54.8	3.16074	5.61967	7.98219	936.751	2371	72	44.8598	74.8454	5.93571	2	9.6	1.2	0.807692	0.266667	0.91	1.11353	1.17392	0.914224	0.517532	1.05164	2.18199
301-1161-1	4539	Tx	16 Weeks	213.135	0.55	332.6	0.839	61.4	2.52255				1736					0.76	13.2	1	1.1	0.222222					0.163045	0.71866
301-1205-2	4579	Tx	16 Weeks	356.219	0.82	-	1.108	101.1		3.90844	7.03426	1149.69	2403.67	70	43.0303	72.4126	5.22342	3.32	18.6	0.2	1.5	0.272727	4.46	1.4613	1.19024	4.46267	0.163045	0.71866	6.86422
301-1226-3	4600	Tx	16 Weeks	293.594	1.01	-	0.794	69.7		2.83734	5.99669	914.984	1606.5	34.7	28.7293	53.6043	5.23601	2.88	8.6	0.8	1.04348	0.375	0.75	1.09439	0.706557	0.754721	0.289783	0.695285	0.51151
301-1308-1	4659	Tx	16 Weeks	107.06	0.74	300.2	0.921	54.6	3.06795	3.43587	6.27839	882.24	2122	65.1	41.1765	70.7004	5.28583	2.12	7.4	1.2	1.3	0.352941	0.91	0.878616	1.01802	0.919829	1.99643	1.28652	0.595748
301-1308-2	4660	Tx	16 Weeks	175.849	1.06	331.6	1.049	60.8	3.16345	4.41548	7.02866	714.567	2388.33	78.6	52.8116	82.9286	5.44193		8.2	1	0.75	0.357143						2.06041	5.09004
301-1339-1	4729	Tx	16 Weeks	50.9596	0.45	359	1.31	66.2	3.64903	4.02615	8.20173	872.171	2953	79.5	40.3846	69.9449	6.11218	1.52	17.4	1.6	1.3	0.352941	1.95	2.43615	2.81231	1.95104	1.67148	2.06041	5.09004
301-1339-5	4731	Tx	16 Weeks	16.4375	0.6	388.4	1.001	55.1	2.57724	4.67601	7.36027	1090.18		63.3	32.0988	58.7889	5.48279	0.64	12	1.2	0.75	0.266667	0.57	1.69688	1.26582	0.572128	2.30965	0.802446	6.01222
301-1349-2	4732	Tx	16 Weeks	115.87	0.97	335.7	1.059	68.4	3.1546	4.41262	7.3083	1032.04	2508.67	91.7	52.8689	82.0563	5.69285		1.2		0.65	0.272727			3.69624
301-1059-1	4437	Tx	16 Weeks	15.8322	0.56	352.9	0.884	55.2	2.50496	4.26077	7.39911	1140.61		134.6	23.3502	45.5315	5.50992	1.88	16.6	0.2	0.76	0.416667	0.34	0.473869	0.419989	0.343149	0.565022	0.51569	0.257416
301-1123-3	4494	Tx	16 Weeks	12.5891	0.44	355.3	1.4	53.1	3.94033	4.63609	8.00704	806.94		62.3	42.9293	72.4976	6.20291	2.36	17.4	1	0.791667	0.6	1.74	1.01746	1.52481	1.74435	0.570956	1.77678	12.6624
301-1339-3	4730	Tx	16 Weeks	19.011	0.34	341.8	1.092	49.7	3.19485	5.15749	6.80772	927.202		42.3	29.4118	54.78	5.93345	0.6	9.4	0.8	1.33333	0.5	3.39	0.769761	0.826062	3.39101	1.46962	0.91688	0.490751
